# Supplementary material for: Polyluminol-polyoxometalate hybrid hydrogels as flexible and soft supercapacitor electrodes
Source: Royal Society of Chemistry journal article supplement (doi:10.1039/d1ta05150d), 2021-01-01
Supplement: d1ta05150d1.pdf [file d1ta05150d1.pdf]

## Supplementary information:

### Poly(luminol)-Polyoxometalates Hybrid Hydrogels as Flexible and Soft Supercapacitor Electrodes

Zahraa AL-Ghaus<sup>1,2</sup>, Alireza Akbarinejad<sup>1,2</sup>, Bicheng Zhu<sup>1,2</sup> and Jadranka Travas-Sejdic<sup>1,2\*</sup>

<sup>1</sup>Polymer Biointerface Centre, School of Chemical Sciences, The University of Auckland, Auckland 1023, New Zealand

<sup>2</sup>MacDiarmid Institute for Advanced Materials and Nanotechnology, Wellington 6140, New Zealand

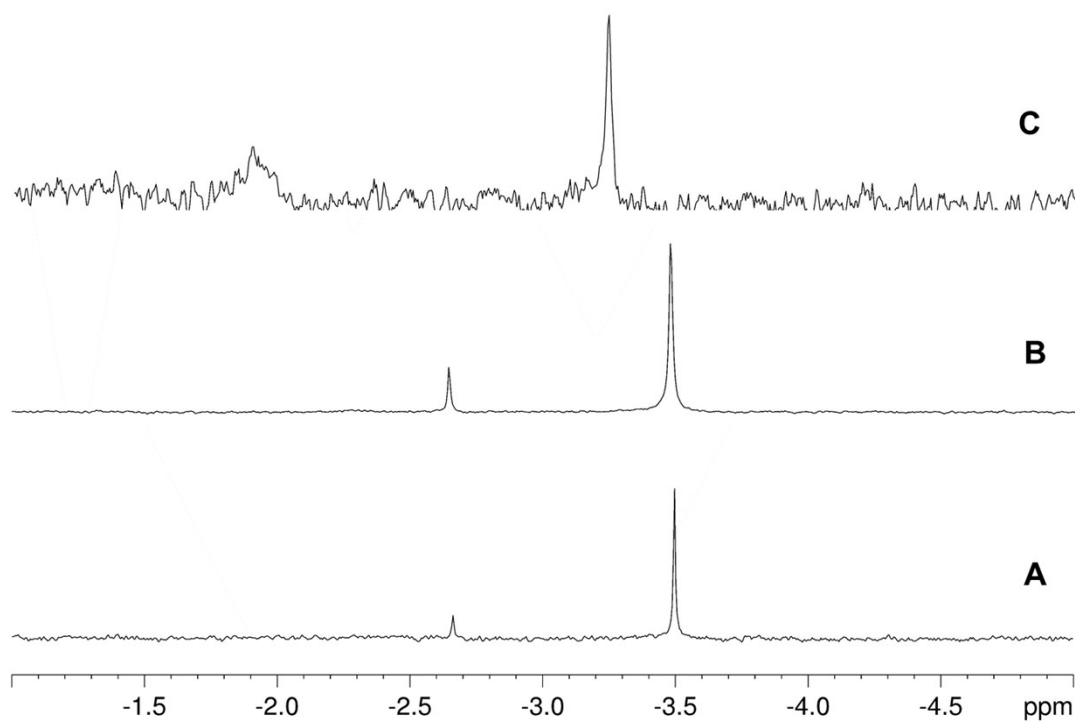

**Figure S1:** <sup>31</sup>P-NMR Spectra for solutions of (A) Poms (B) mixture of Poms and luminol, and (C), and PLum-doped by Poms.

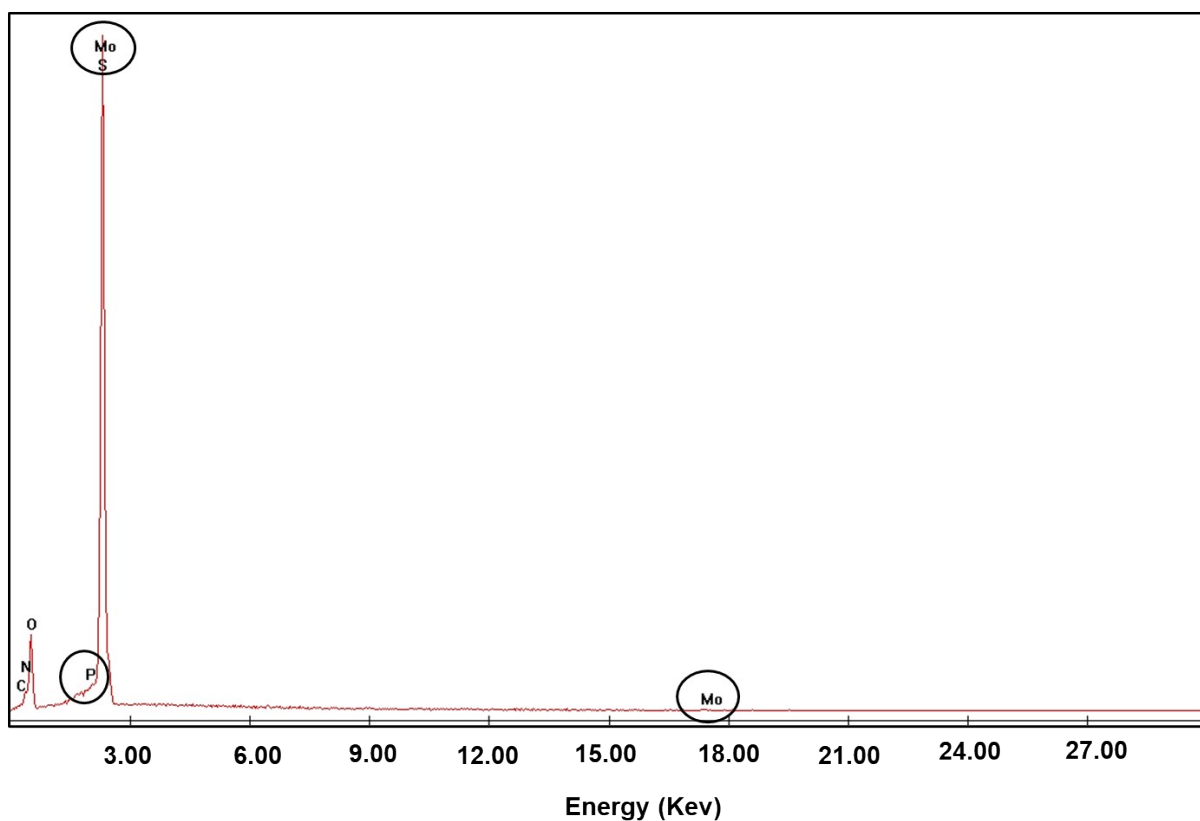

**Figure S2:** The energy-dispersive X-ray spectroscopy (EDX) of the hybrid hydrogel.

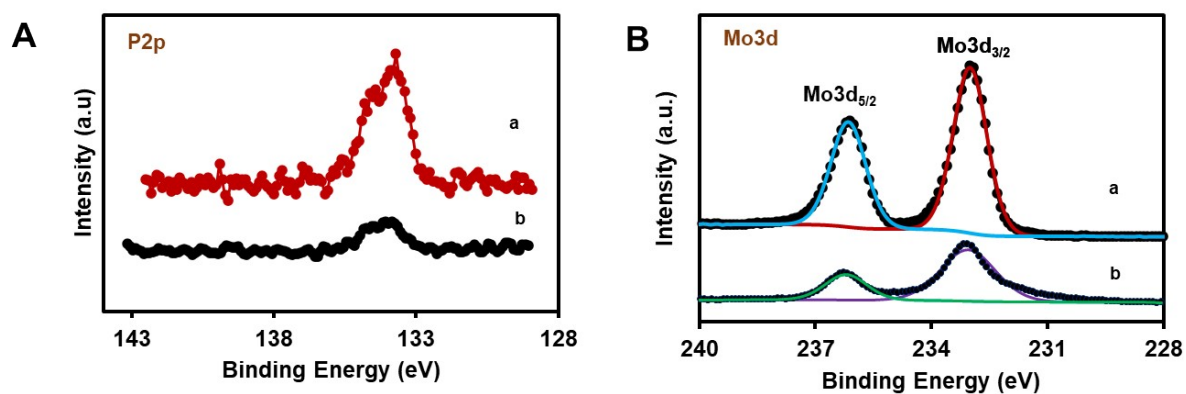

**Figure S3:** High-resolution XPS of P 2p (A), and Mo 3d (B) of (a) PLum hydrogel and (b) pure phosphomolybdic acid.

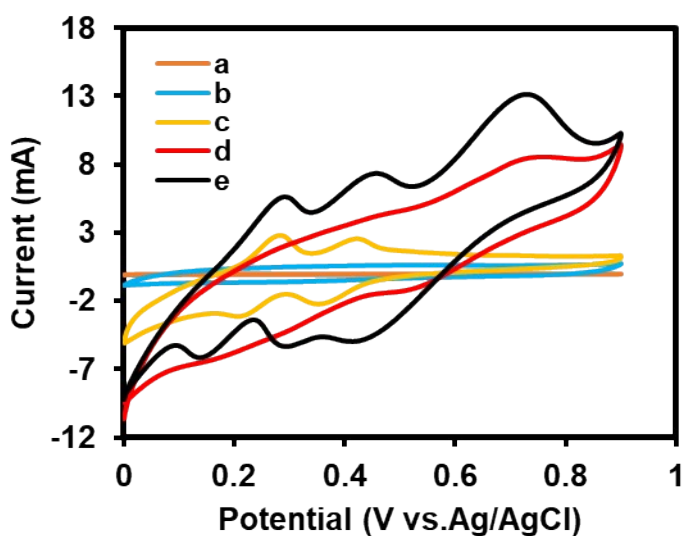

**Fig S4:** Cyclic voltammograms of: (a) CFC, (b) CFC/PAM/SA, (c) CFC/PAM/SA- Poms, (d) PLum electrode and (e) hybrid PAM/SA-PLum/Poms electrode, at scan rate of  $10 \text{ mV s}^{-1}$  in  $1 \text{ M H}_2\text{SO}_4(\text{aq})$ .

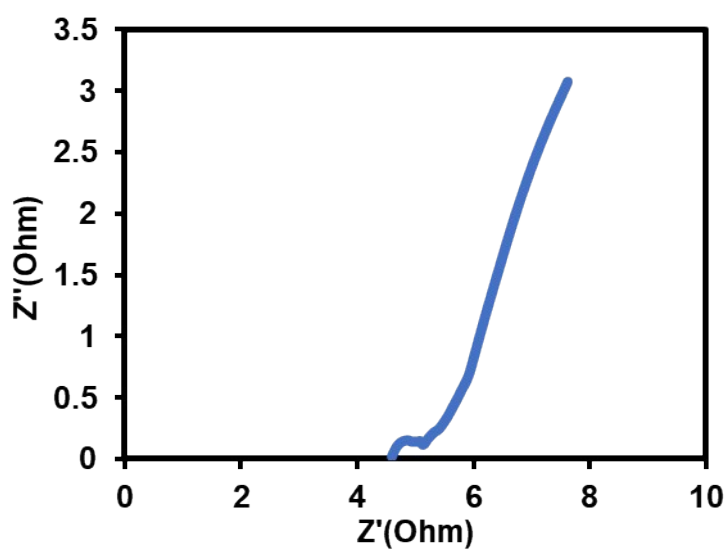

**Figure S5:** Nyquist plots of the hybrid hydrogel electrode (CFC/PAM/SA/PLum/Poms) in a frequency range of  $0.1 \text{ Hz}$ – $100 \text{ kHz}$

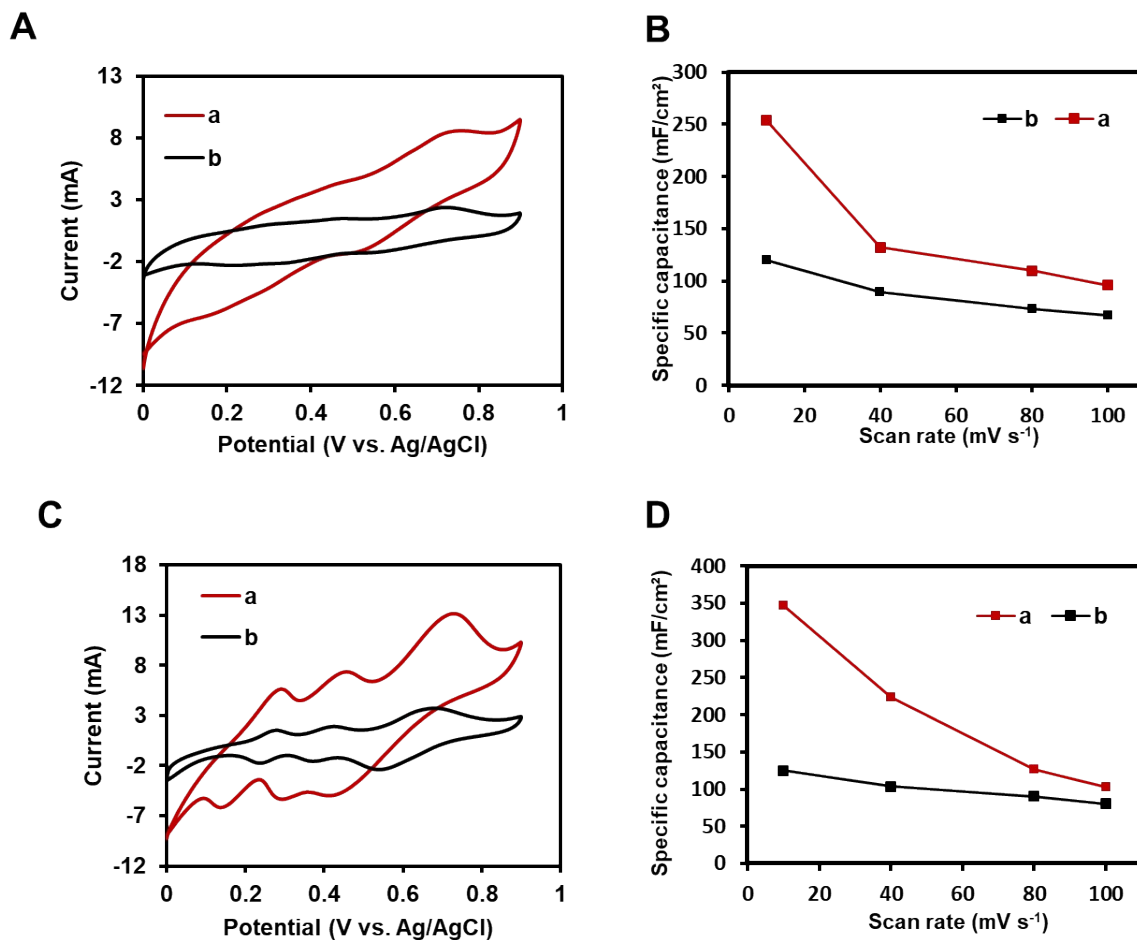

**Figure S6.** (A) Cyclic voltammograms of (a) PLum hydrogel electrode (CFC/PAM/SA/PLum) and (b) CFC-supported PLum electrode in 1M H<sub>2</sub>SO<sub>4</sub> solution at 10 mVs<sup>-1</sup>; (B) Specific capacitance at different scanning rates of (a) PLum hydrogel electrode and (b) CFC-supported PLum electrode in 1M H<sub>2</sub>SO<sub>4</sub> solution at 10 mVs<sup>-1</sup>; (C) Cyclic voltammograms of (a) hybrid hydrogel electrode (CFC/PAM/SA/PLum/Poms) and (b) CFC-supported PLum/Poms electrode in 1 M H<sub>2</sub>SO<sub>4</sub> solution at 10 mV<sup>-1</sup>; (D) Specific capacitance plots at different scanning rates of (a) hybrid hydrogel electrode and (b) CFC-supported PLum/Poms electrode.

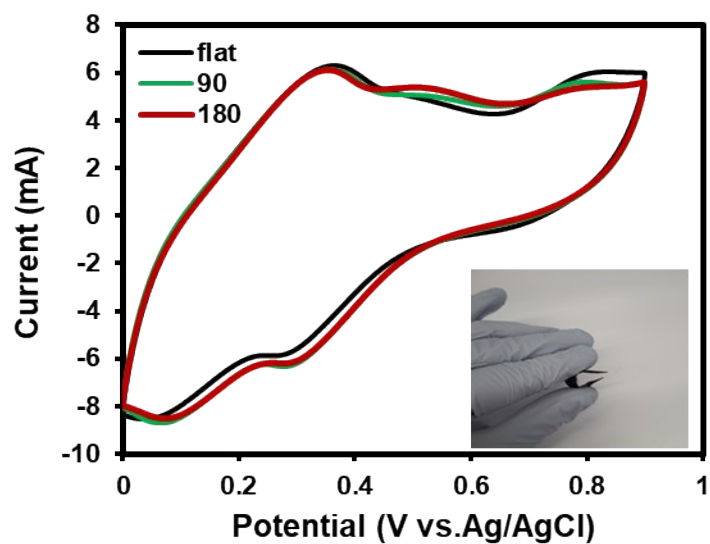

**Figure S7.** Cyclic voltammograms of the flaxible supercapacitor at different bending angles ( $0^\circ$ ,  $90^\circ$  and  $180^\circ$ ) at a constant scan rate of  $40 \text{ mV cm}^{-1}$ . Inset: optical photograph of the fabricated flexible device in a bended state.
